# Supplementary material
Source: Springer Nature journal article supplement (https://www.springermedizin.de/resource/supplementary/12889_2011_3339_MOESM6_ESM.pdf/9488876)

**1**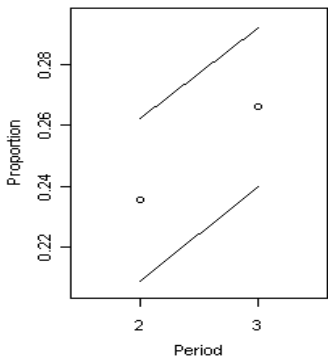**2**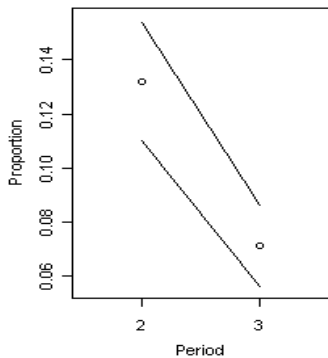**3**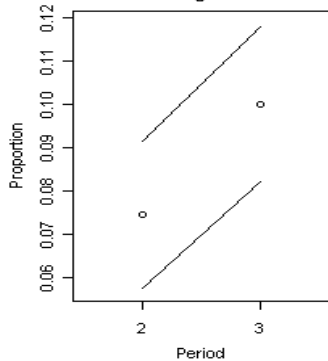**4**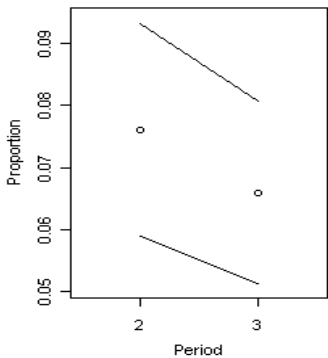**5**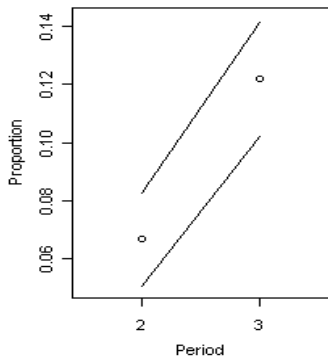**6**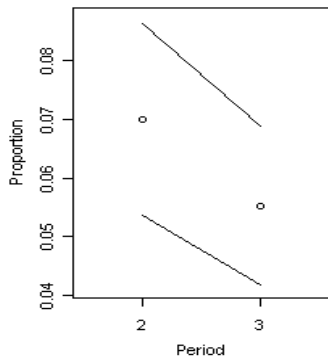

Supplement: MOESM6 [file 9488876]
